# Supplementary material for: Viable stretchable plasmonics based on unidirectional nanoprisms
Source: Royal Society of Chemistry journal article supplement (doi:10.1039/c7nr08299a), 2018-01-01
Supplement: c7nr08299a1.pdf [file c7nr08299a1.pdf]

Supporting Information

# Viable Stretchable Plasmonics Based on Unidirectional Nanoprisms

*Ji-Eun Lee,<sup>1</sup> Choojin Park,<sup>2</sup> Kyungwha Chung,<sup>1</sup> Ju Won Lim,<sup>1</sup> Filipe Marques Mota,<sup>1</sup> Unyong Jeong,<sup>3,\*</sup> Dong Ha Kim<sup>1,\*</sup>*

<sup>1</sup> Department of Chemistry and Nano Science, Division of Molecular Life and Chemical Sciences, College of Natural Sciences, Ewha Womans University, 52, Ewhayeodae-Gil, Seodaemun-Gu, Seoul 03760, Korea

<sup>2</sup> Department of Materials Science and Engineering, Yonsei University, 50 Yonsei-ro Seodaemun-gu, Seoul, 03722, Korea.

<sup>3</sup> Department of Materials Science and Engineering, Pohang University of Science and Technology, 77 Cheongam-Ro, Nam-Gu, Pohang, Gyungbuk 37673, Korea.

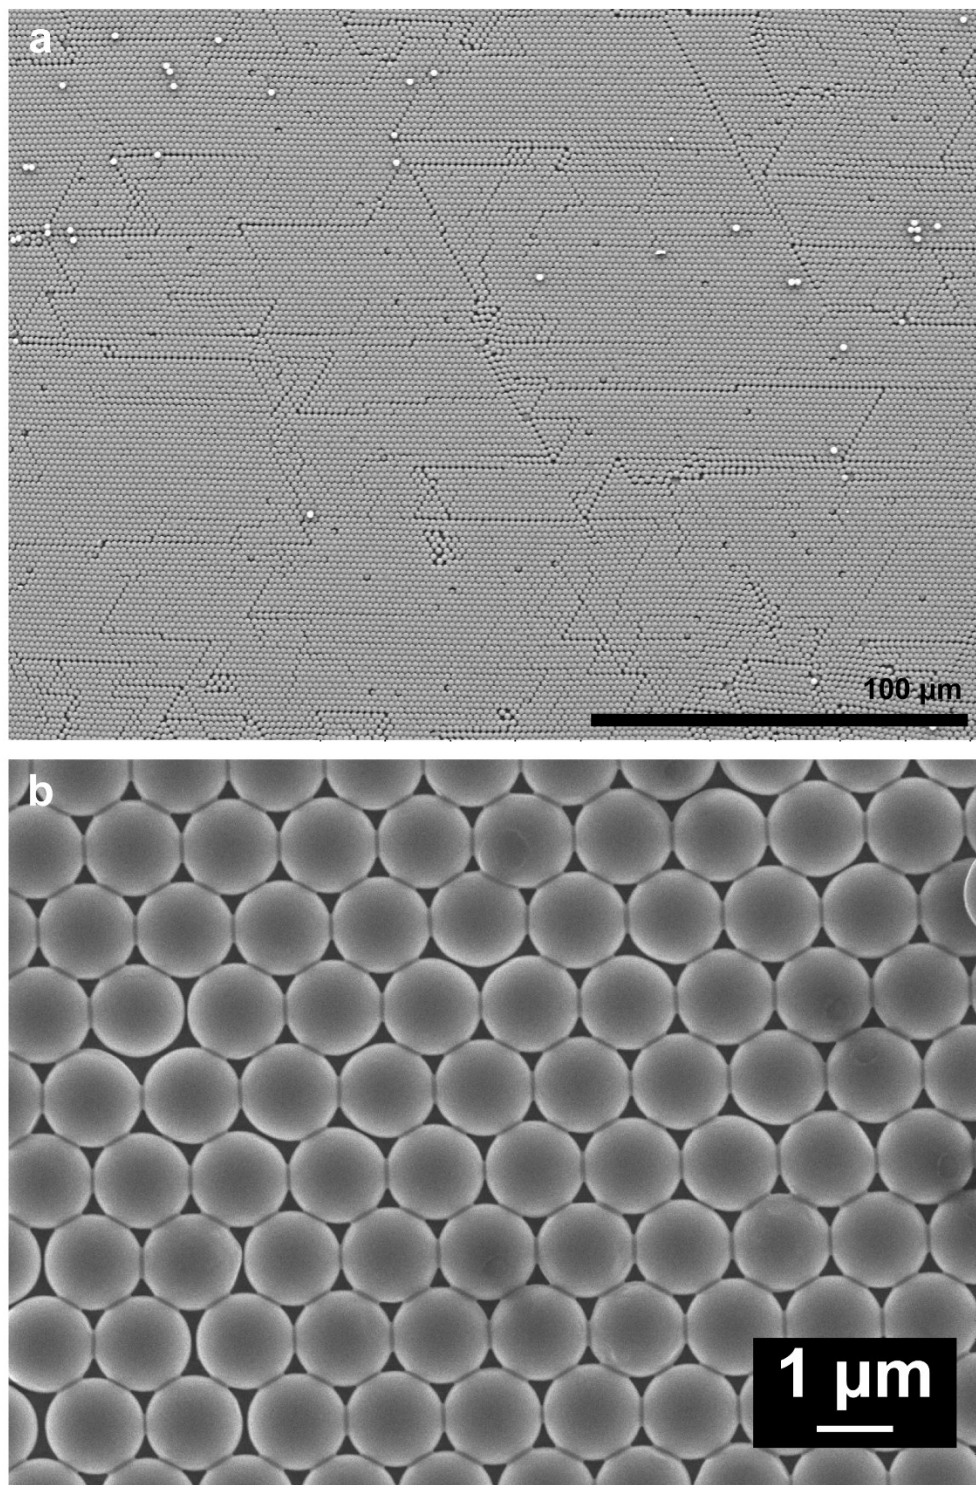

**Figure S1.** (a) SEM image of closely packed PS monolayer on the PDMS film by rubbing process.  
(b) Magnified SEM image of PS bead monolayer arrays.

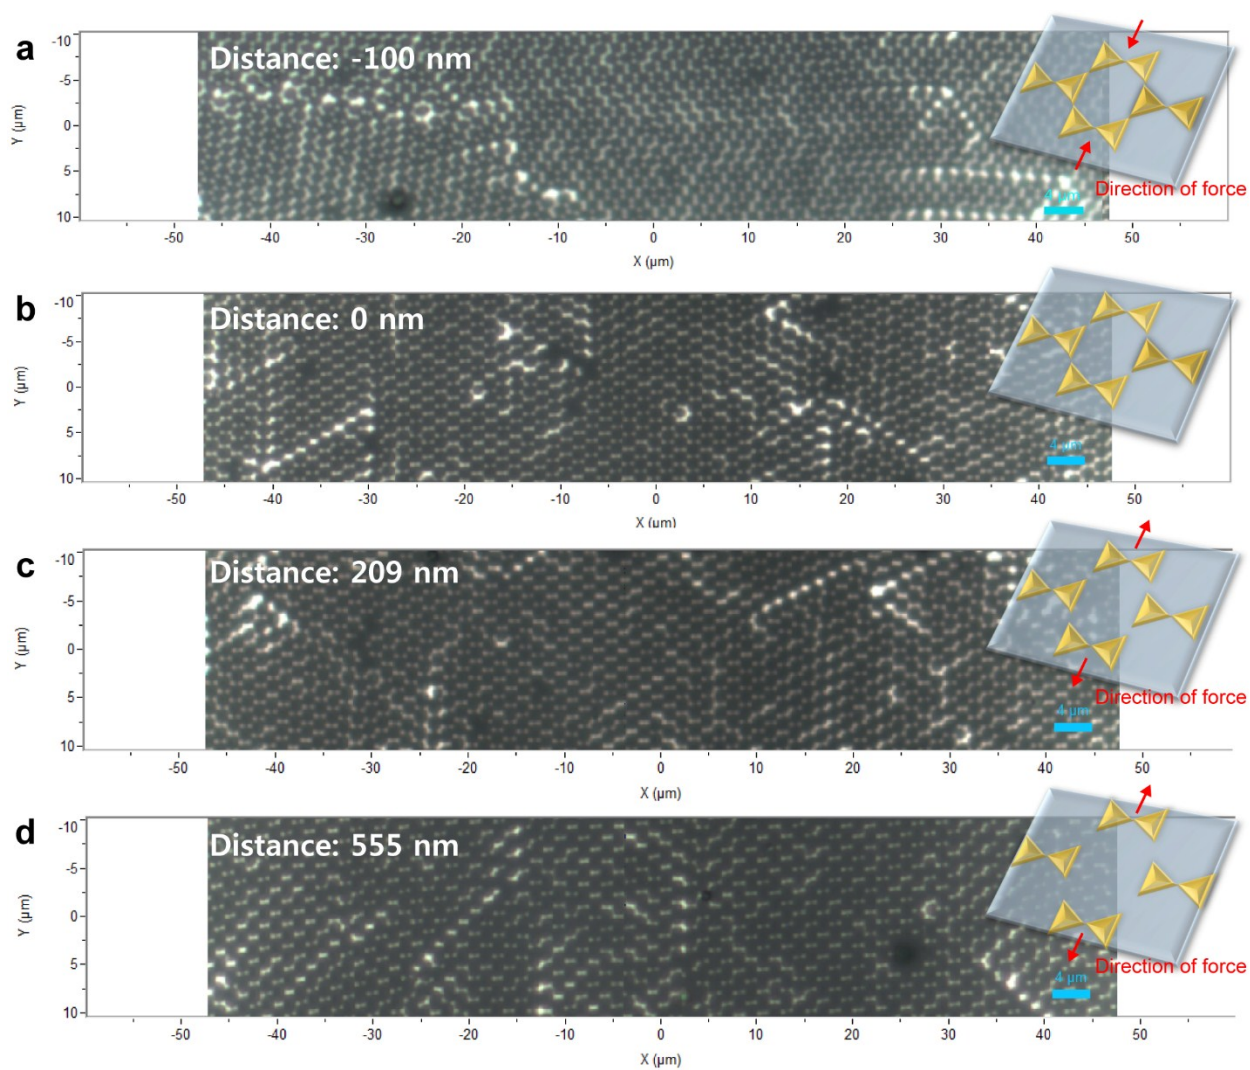

**Figure S2.** Optical microscope images of Ag/Au bilayer nanoprism arrays with extension and contraction states: (a) -6%, (b) 0%, (c) 20% and (d) 100%.

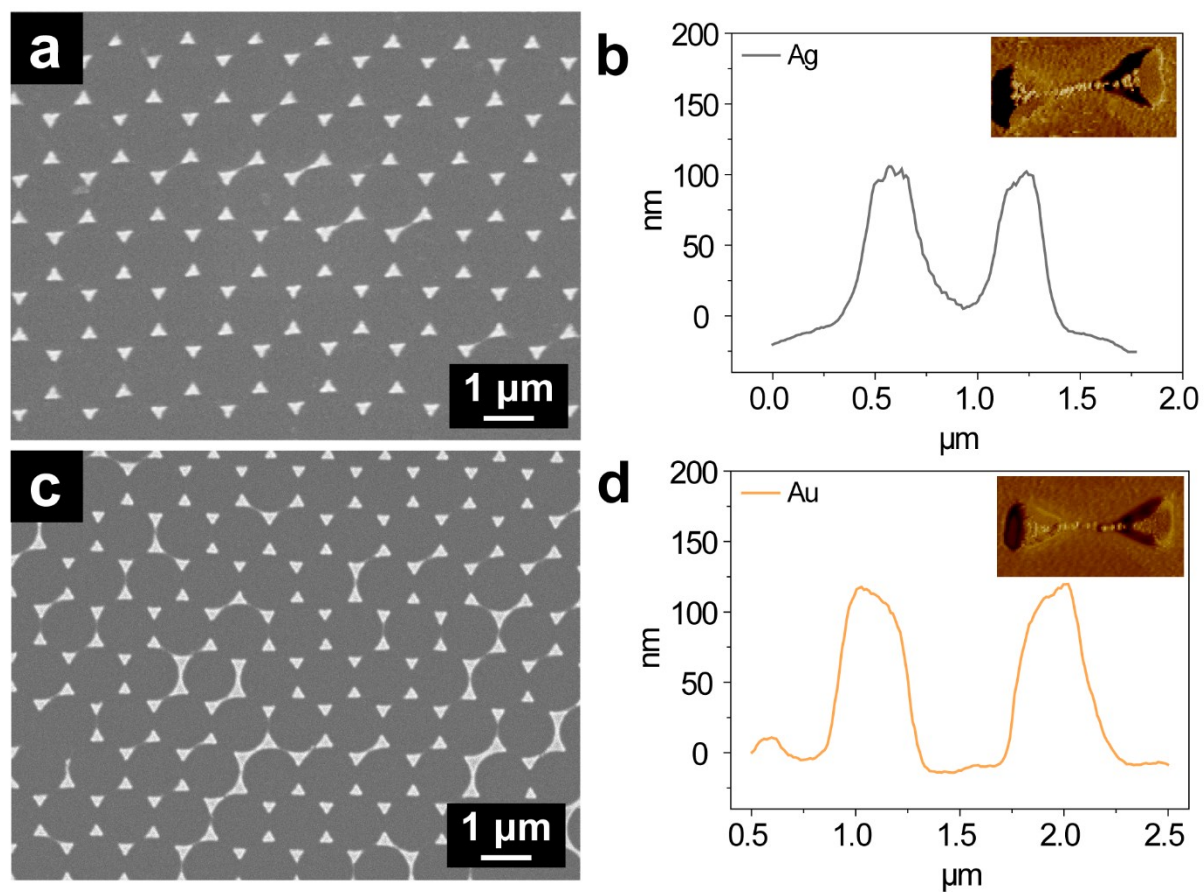

**Figure S3.** SEM images (a, c) and cross-sectional AFM profiles (b, d) of the sample surfaces. Insets in Figure B & D are height contrast AFM images. (a), (b) Ag nanoprism arrays; (c), (d) Au nanoprism arrays.

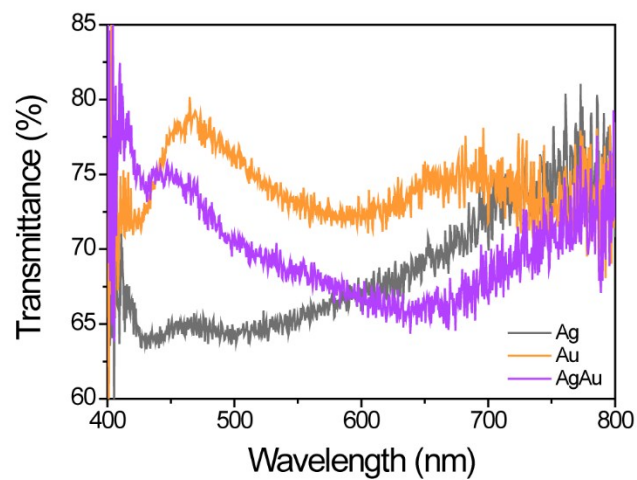

**Figure S4.** Transmittance spectra of the unit of the different metal single nanoprisms with contraction of 0%.

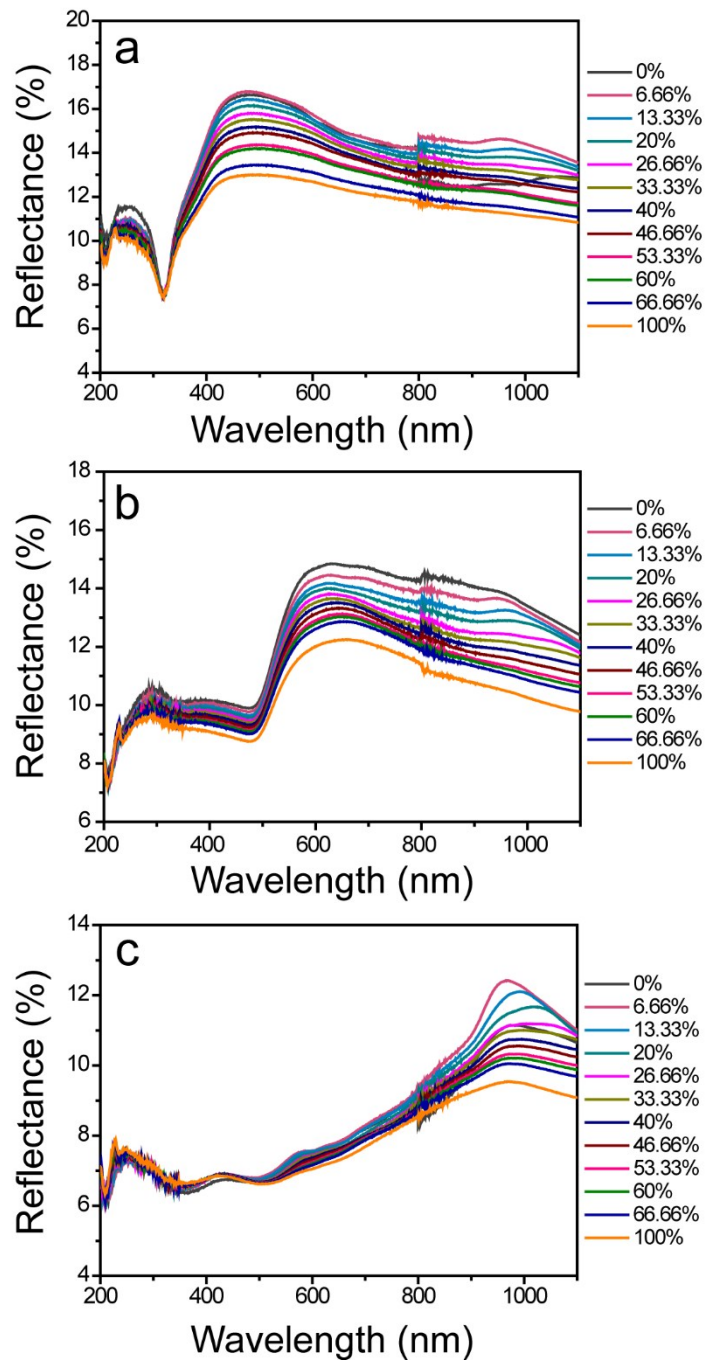

**Figure S5.** Reflectance spectra of metal nanoprism arrays on thinner PDMS substrates with different extension ratio obtained from (a) Ag nanoprism arrays (b) Au nanoprism arrays, and (c) Ag/Au bilayer nanoprism arrays.

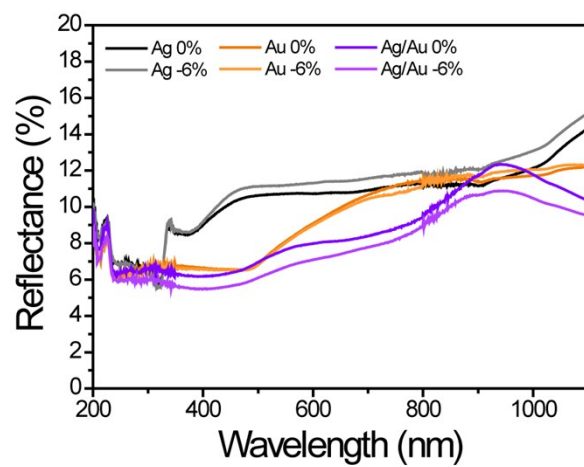

**Figure S6.** Reflectance spectra of metal nanoprism arrays on thicker PDMS substrates with contraction ratio of 0 and -6%.

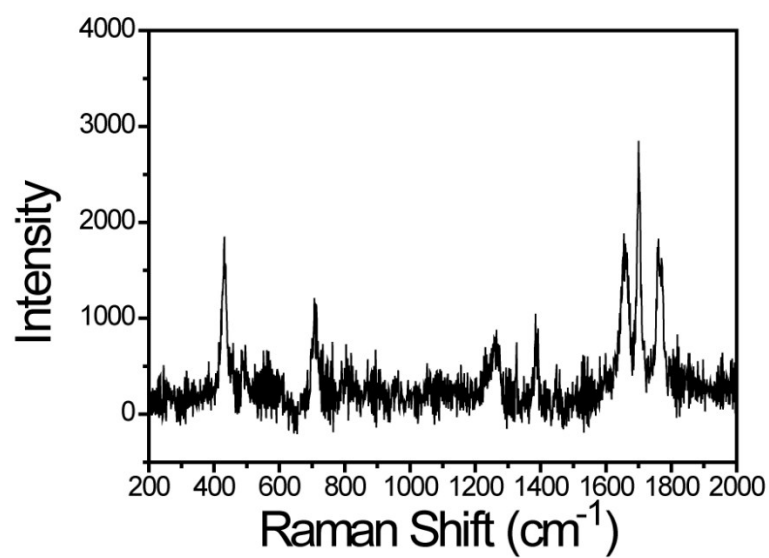

**Figure S7.** SERS spectrum of adsorbed *p*-ATP molecules on the PDMS without metal nanoprism arrays.

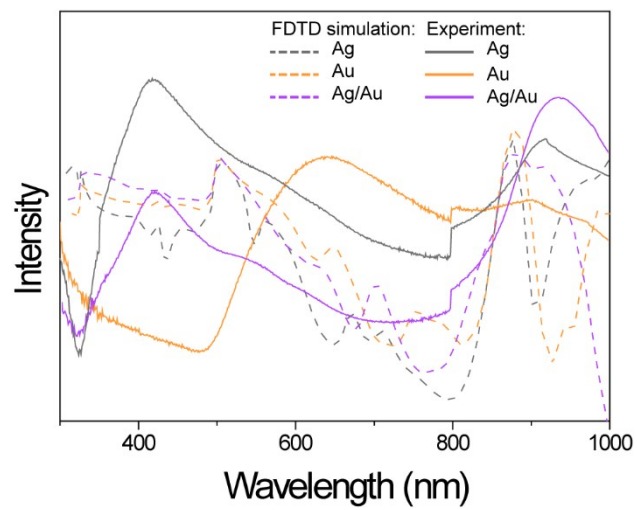

**Figure S8.** FDTD calculated absorption spectra of different metal nanoprism arrays with contraction of 0%.
